# Supplementary material for: Discovery of New Microneme Proteins in Cryptosporidium parvum and Implication of the Roles of a Rhomboid Membrane Protein (CpROM1) in Host–Parasite Interaction
Source: Frontiers journal article supplement (doi:10.3389/fvets.2021.778560), 2021-12-13
Supplement: Data_Sheet_1.PDF [file Data_Sheet_1.PDF]

**Table S1.** List of candidate microneme proteins and summary of observations in this study

| No. | Gene ID   | CryptoDB description                                                                            | Protein size | Synthetic immunogen (aa positions) | Type of antibody used in IFA                                      | IFA signals in sporozoite                                                | IEM labeling in sporozoite          | Micronemal ? | Conclusion (evidence)                                |
|-----|-----------|-------------------------------------------------------------------------------------------------|--------------|------------------------------------|-------------------------------------------------------------------|--------------------------------------------------------------------------|-------------------------------------|--------------|------------------------------------------------------|
| 1   | cgd3_980  | Peptidase S54 rhomboid domain containing protein (named as CpROM1 in this study)                | 282 aa       | ILITWGNPSS (129-138)               | Antiserum                                                         | Anterior third (strongest), pellicle and cystalloid body; Surface (weak) | Microneme (strong); PVM (moderate?) | Yes          | Microneme (main) and other membranes; PVM (IFA, IEM) |
| 2   | cgd1_3550 | Apple domain containing protein                                                                 | 925 aa       | EKNTEQNTEF (687-696)               | Antiserum                                                         | Anterior third (strong), other areas up to nuclei (weak)                 | Antibody not working                | Very likely  | Very likely micronemal, but non-exclusively (IFA)    |
| 3   | cgd1_3680 | EGF-like domain containing protein                                                              | 263 aa       | CAGDQTINSG (51-60)                 | Antiserum                                                         | Anterior third (strong); other pellicular up to nuclei (weak)            | Antibody not working                | Very likely  | Very likely micronemal, but non-exclusively (IFA)    |
| 4   | cgd2_1590 | Apple/EGF-like/Apple domain containing extracellular protein                                    | 614 aa       | AGGIPPPRGTFNP (564-577)            | Affinity-purified                                                 | Anterior half (strong); posterior half (weak)                            | Antibody not working                | Very likely  | Very likely micronemal, but non-exclusively (IFA)    |
| 5   | cgd6_3730 | Signal peptide, Peptidase S8/S53 domain containing protein                                      | 2269 aa      | SSASPPSYAT (564-574)               | Antiserum                                                         | Pellicule with some granulated signals (stronger in the anterior half)   | Not tested                          | No           | Pellicular; likely non-micronemal                    |
| 6   | cgd2_470  | Uncharacterized protein                                                                         | 1359 aa      | QNSLDWNPSL (1108-1118)             | Affinity-purified                                                 | Cytosol with some granular signals                                       | Not tested                          | No           | Non-micronemal; cytosolic                            |
| 7   | cgd3_1860 | EGF-like domain containing extracellular protein                                                | 568 aa       | KREPKTGNNV (537-546)               | Affinity-purified                                                 | Pellicle (strong) and cytosol (weak)                                     | Not tested                          | No           | Non-micronemal; likely pellicular                    |
| 8   | cgd3_520  | PAN/Apple domain containing protein                                                             | 683 aa       | PEYFNDGPFPSL (28-40)               | Antiserum                                                         | Cytosol with granulated signals                                          | Not tested                          | No           | Non-micronemal; cytosolic                            |
| 9   | cgd6_670  | Aspartic acid and asparagine hydroxylation/Peptidase C11, clostripain domain containing protein | 1607 aa      | WNHGSAWSGFGDD (266-278)            | Affinity-purified                                                 | Cytosol with some granulated signals                                     | Not tested                          | No           | Non-micronemal; cytosolic                            |
| 10  | cgd6_760  | Peptidase S54 rhomboid (named as CpROM3 here)                                                   | 990 aa       | PVPASAQT (336-343)                 | Antibody production failure; no titer to peptide antigen by ELISA |                                                                          |                                     |              |                                                      |
